# Supplementary material
Source: ML conference proceedings conference paper supplement (https://proceedings.mlr.press/v84/genevay18a.html)
Supplement: Supplementary file [file genevay18a-supp.pdf]

# Learning Generative Models with Sinkhorn Divergences *Supplementary Material*

Anonymous

October 20, 2017

## Abstract

These supplementary materials present numerical evidence of the low-sample complexity of Sinkhorn divergence, and of its positivity.

## 1 Numerical Exploration of the Sinkhorn Divergence

### 1.1 Sample Complexity

To better grasp the statistical tradeoff offered by the entropic regularization, we study numerically the so-called sample complexity of these divergence. We consider

$$\hat{\mu}_N = \frac{1}{N} \sum_{i=1}^N \delta_{x_i} \quad \text{and} \quad \hat{\nu}_N = \frac{1}{N} \sum_{i=1}^N \delta_{y_i}$$

which are random measures, where the  $(x_i)_i$  and  $(y_i)_i$  are points independently drawn from the same distribution  $\xi$ . In the numerical experiments,  $\xi$  is the uniform distribution on  $[0, 1]^d$  where  $d \in \mathbb{N}^*$  is the ambient dimension.

We recall that

$$\bar{\mathcal{W}}_{c,\varepsilon}(\mu, \nu) \stackrel{\text{def.}}{=} 2\mathcal{W}_{c,\varepsilon}(\mu, \nu) - \mathcal{W}_{c,\varepsilon}(\mu, \mu) - \mathcal{W}_{c,\varepsilon}(\nu, \nu)$$

$$\text{where } \mathcal{W}_{c,\varepsilon}(\mu, \nu) \stackrel{\text{def.}}{=} \int c(x, y) d\gamma_\varepsilon$$

where  $\gamma_\varepsilon$  is the unique solution of the entropy-regularization optimal transport problem between  $\mu$  and  $\nu$ . In the following, we consider  $c(x, y) = \|x - y\|^p$  for  $p = 3/2$  for  $(x, y) \in (\mathbb{R}^d)^2$ .

As shown in the paper, one has

$$\mathcal{W}_{c,\varepsilon}(\mu, \nu) \xrightarrow{\varepsilon \rightarrow 0} 2W_p(\mu, \nu)^p \quad \text{and} \quad \mathcal{W}_{c,\varepsilon}(\mu, \nu) \xrightarrow{\varepsilon \rightarrow +\infty} \|\mu - \nu\|_{\text{ED}(p)}^2$$

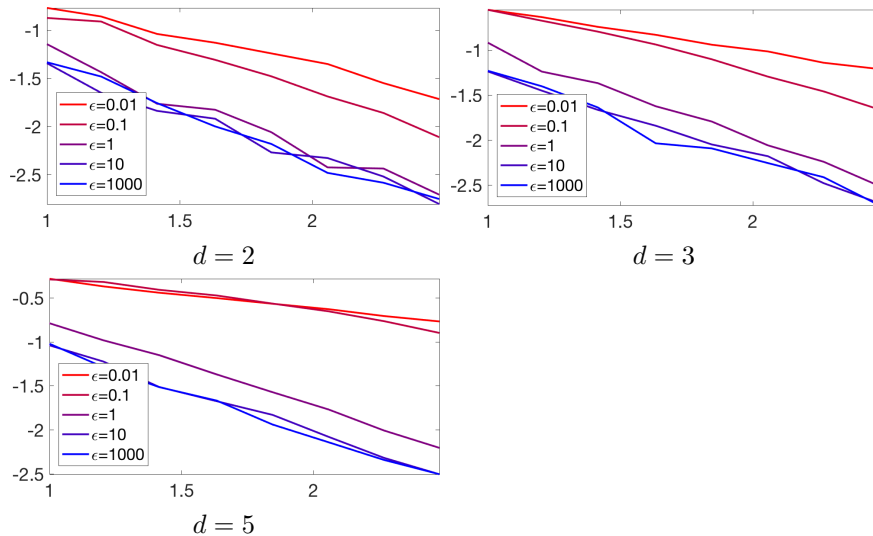

Figure 1: Influence of the regularization  $\varepsilon$  on the sample complexity rate. The plot displays  $\log_{10}(R_{\varepsilon,d}(N))$  as a function of  $\log(N)$ .

where  $W_p$  is the Wasserstein- $p$  distance while  $\|\xi\|_{\text{ED}(p)}^2 = \int -\|x-y\|^p d\xi(x)d\xi(y)$  is the Energy Distance, which is a special case of MMD norm for  $0 < p < 2$ .

The goal is to study numerically the decay rate toward zero of

$$R_{\varepsilon,d}(N) \stackrel{\text{def.}}{=} \mathbb{E}(\bar{\mathcal{W}}_{c,\varepsilon}(\hat{\mu}_N, \hat{\nu}_N))$$

and also analyze the standard deviation

$$S_{\varepsilon,d}^2(N) \stackrel{\text{def.}}{=} \mathbb{E}(|\bar{\mathcal{W}}_{c,\varepsilon}(\hat{\mu}_N, \hat{\nu}_N) - R_{\varepsilon,d}(N)|^2).$$

In these formula, the expectation  $\mathbb{E}$  with respect to random draws of  $(x_i)_i$  and  $(y_i)_i$  is estimated numerically by averaging over  $10^3$  drawings. For optimal transport, i.e.  $\varepsilon = 0$ , it is well-known (we refer to the references given in the paper) that  $R_{0,d}(N) = O(\frac{1}{N^{p/d}})$ , while for MMD norm, i.e.  $\varepsilon = +\infty$ , one has  $R_{+\infty,d}(N) = O(\frac{1}{N})$ .

Figure 2 (resp. 1) display in log-log plot the decay of  $R_{\varepsilon,d}(N)$  with  $N$ , and allows to compare on a single plot the influence of  $d$  (resp.  $\varepsilon$ ) for a fixed  $\varepsilon$  (resp.  $d$ ) on each plot.

From these experiments, one can conclude on this distribution  $\xi$  that:

- $\mathcal{W}_{c,\varepsilon}(\mu, \nu) \geq 0$  (more on this in the following section).
- $R_{\varepsilon,d}(N)$  as a polynomial decay of the form  $1/N^{\kappa_{\varepsilon,d}}$ .
- One recovers the known rates  $\kappa_{0,d} = p/d$  (here for  $p = 3/2$ ) and  $\kappa_{\infty,d} = 1$ .
- Small values of  $\varepsilon < 1$  have rates  $\kappa_{\varepsilon,d}$  close to the rate of OT  $\kappa_{0,d}$ .

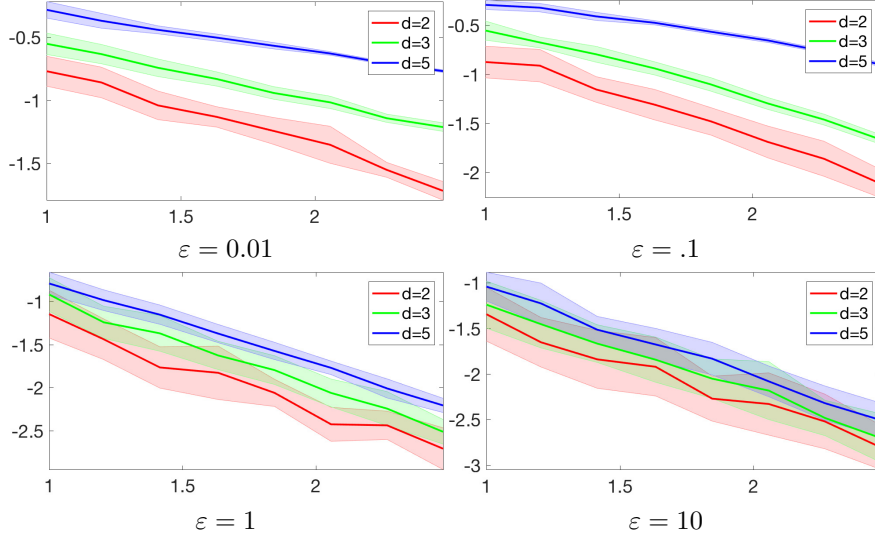

Figure 2: Influence of the dimension  $d$  on the sample complexity rate for difference  $d$ . The plot displays  $\log_{10}(R_{\varepsilon,d}(N))$  as a function of  $\log(N)$ . The shaded bar display the confidence interval at  $\pm S_{\varepsilon,d}(N)$ .

- Large values of  $\varepsilon > 1$  have rates  $\kappa_{\varepsilon,d}$  matching almost exactly the rate of MMD  $\kappa_{+\infty,d} = 1$ .
- The variance  $S_{\varepsilon,d}^2(N)$  is significantly smaller for small values of  $\varepsilon$  (i.e. close to OT).

Note that similar conclusion are obtained when testing on other distributions  $\xi$  (e.g. a Gaussian).

## 1.2 Positivity

For  $\varepsilon \in \{0, +\infty\}$ , both OT and MMD are distances, so that  $\bar{W}_{\varepsilon,c}(\mu, \nu) = 0$  if and only if  $\mu = \nu$ . It not known whether this property is true for  $0 < \varepsilon < +\infty$ , and this seems a very difficult problem to tackle. We investigate numerically this question by looking at small modification of a discrete input measure  $\mu = \frac{1}{\sum_i a_i} \sum_{i=1}^N a_i \delta_{x_i}$  where the  $x_i$  are i.i.d. points drawn in  $[0, 1]^2$  and  $(a_i)_i$  are i.i.d. number drawn uniformly in  $[1/2, 1]$ , and perform a small modification

$$\mu_t \stackrel{\text{def.}}{=} \frac{1}{\sum_i a_{i,t}} \sum_{i=1}^N a_i \delta_{x_{i,t}} \quad \text{where} \quad \begin{cases} a_{i,t} = a_{i,t} + t b_i, \\ x_{i,t} = x_i + t z_i, \end{cases}$$

where  $(b_i)_i \subset \mathbb{R}$  are i.i.d. Gaussian distributed  $\mathcal{N}(0, 1)$  and where  $(z_i)_i \subset \mathbb{R}^2$  are i.i.d. Gaussian distributed  $\mathcal{N}(0, \text{Id}_2)$ .

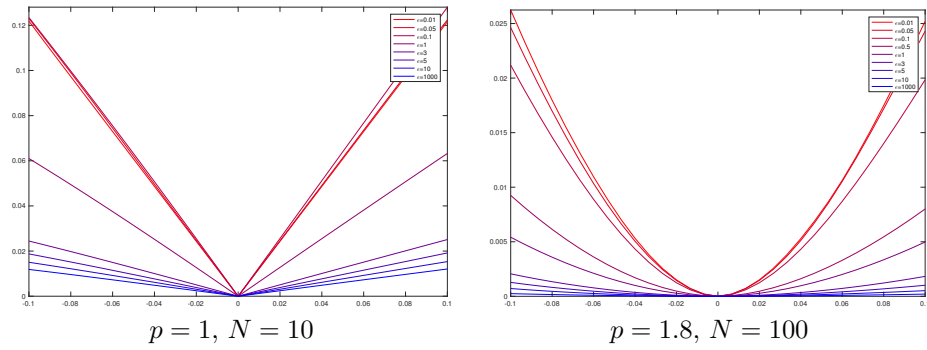

Figure 3: Test of the positivity of  $\bar{\mathcal{W}}_{\varepsilon,c}(\mu, \mu_t)$  as a function of the perturbation parameter  $t$ .

Figure (3) shows, on a single realization of  $(a_i, x_i, b_i, z_i)$ , that  $\bar{\mathcal{W}}_{\varepsilon,c}(\mu, \mu_t) > 0$  for  $t \neq 0$ . Testing for  $10^4$  other realizations gives the same results, showing that experimentally  $\bar{\mathcal{W}}_{\varepsilon,c}$  is locally strictly positive for discrete measures.
